# Supplementary material for: Comparison of a Focused Family Cancer History Questionnaire to Family History Documentation in the Electronic Medical Record
Source: PubMed Central journal article supplement — J Prim Care Community Health. 2022 Jan 22;13:21501319211069756. doi: 10.1177/21501319211069756 (PMC8796064; doi:10.1177/21501319211069756), 2022-01-22

# Family Medicine Cancer Screening

Questionnaire last updated at: 09:27 AM EDT / 27 June 2018

 **Thomas Tester**  
MRN: 12344343344

| PATIENT INFORMATION   |      |                   |             | 09:13 AM EDT / 07 June 2018 |                |
|-----------------------|------|-------------------|-------------|-----------------------------|----------------|
| FIRST NAME            | M.I. | LAST NAME         | GENDER      | DATE OF BIRTH               |                |
| Thomas                |      | Tester            | Male        | 1999-01-01                  |                |
| STREET ADDRESS        |      |                   | CITY        | STATE/PROVINCE              | COUNTRY        |
| 100 Yellow Brick Road |      |                   | New York    | New York                    | United States  |
| PHONE                 |      | EMERGENCY CONTACT |             |                             |                |
| +1 778 319 0582       |      | 7783190582        |             |                             | ----<br>Father |
| EMAIL                 |      |                   | MRN         |                             |                |
| thomas@tester.com     |      |                   | 12344343344 |                             |                |

| QNAIRE RESPONSE |                                                                                                                                                                                 | Score: 16.0                                                                                                                                                                                                                                                                                                                                                                                                                                                                                                                                                                                                                                                                                 | 07:54 AM EDT / 11 July 2018 |
|-----------------|---------------------------------------------------------------------------------------------------------------------------------------------------------------------------------|---------------------------------------------------------------------------------------------------------------------------------------------------------------------------------------------------------------------------------------------------------------------------------------------------------------------------------------------------------------------------------------------------------------------------------------------------------------------------------------------------------------------------------------------------------------------------------------------------------------------------------------------------------------------------------------------|-----------------------------|
| 1.              | Have you been diagnosed with any of the below cancers?                                                                                                                          | <input checked="" type="checkbox"/> <b>Breast</b> <input type="checkbox"/> Uterine/ Endometrial <input checked="" type="checkbox"/> <b>Ovarian</b><br><input type="checkbox"/> Cervical <input type="checkbox"/> Colon <input type="checkbox"/> Pancreas <input type="checkbox"/> Prostate<br><input type="checkbox"/> Melanoma <input type="checkbox"/> Sarcoma <input type="checkbox"/> Gastric <input type="checkbox"/> Kidney<br><input type="checkbox"/> Leukemia <input type="checkbox"/> Brain tumor<br><input type="checkbox"/> Adrenal cortical carcinoma <input type="checkbox"/> Thyroid<br><input type="checkbox"/> Origin of the cancer is unknown <input type="checkbox"/> No |                             |
| 1.1.            | Are you a male or a female?                                                                                                                                                     | <input type="checkbox"/> Male <input checked="" type="checkbox"/> <b>Female</b>                                                                                                                                                                                                                                                                                                                                                                                                                                                                                                                                                                                                             |                             |
| 1.1.1.          | What age were you diagnosed with breast cancer?                                                                                                                                 | <input checked="" type="checkbox"/> <b>Age 50 or younger</b> <input type="checkbox"/> Age 51-60<br><input type="checkbox"/> Over the age of 60                                                                                                                                                                                                                                                                                                                                                                                                                                                                                                                                              |                             |
| 1.1.1.1.        | Do any of the following describe your breast cancer?                                                                                                                            | <input type="checkbox"/> Triple Negative (estrogen, progesterone, HER2 negative)<br><input type="checkbox"/> Bilateral (cancer in both breasts) <input type="checkbox"/> No or unsure                                                                                                                                                                                                                                                                                                                                                                                                                                                                                                       |                             |
| 1.1.1.2.        | Do any of the following describe your breast cancer?                                                                                                                            | <input type="checkbox"/> Bilateral (cancer in both breasts) <input type="checkbox"/> No or unsure                                                                                                                                                                                                                                                                                                                                                                                                                                                                                                                                                                                           |                             |
| 1.2.            | What age were you diagnosed with uterine cancer?                                                                                                                                | <input type="checkbox"/> Age 50 or younger <input type="checkbox"/> Age 51 or older                                                                                                                                                                                                                                                                                                                                                                                                                                                                                                                                                                                                         |                             |
| 1.3.            | What age were you diagnosed with colon cancer?                                                                                                                                  | <input type="checkbox"/> Age 50 or younger <input type="checkbox"/> Age 51 or older                                                                                                                                                                                                                                                                                                                                                                                                                                                                                                                                                                                                         |                             |
| 1.4.            | What age were you diagnosed with pancreas cancer?                                                                                                                               | <input type="checkbox"/> Age 60 or younger <input type="checkbox"/> Age 61 or older                                                                                                                                                                                                                                                                                                                                                                                                                                                                                                                                                                                                         |                             |
| 1.5.            | Do any of the following describe your prostate cancer?                                                                                                                          | <input type="checkbox"/> Metastatic prostate cancer<br><input type="checkbox"/> Gleason score of 7 or higher<br><input type="checkbox"/> Gleason score lower than 7 or unsure                                                                                                                                                                                                                                                                                                                                                                                                                                                                                                               |                             |
| 1.6.            | Do any of the following describe your gastric cancer?                                                                                                                           | <input type="checkbox"/> Diffuse <input type="checkbox"/> No or unsure                                                                                                                                                                                                                                                                                                                                                                                                                                                                                                                                                                                                                      |                             |
| 2.              | Are you of Ashkenazi (Eastern European) Jewish descent?                                                                                                                         | <input checked="" type="checkbox"/> <b>Yes</b> <input type="checkbox"/> No                                                                                                                                                                                                                                                                                                                                                                                                                                                                                                                                                                                                                  |                             |
| 3.              | Have any of your family members been diagnosed with a hereditary cancer syndrome?                                                                                               | <input checked="" type="checkbox"/> <b>Yes</b> <input type="checkbox"/> No                                                                                                                                                                                                                                                                                                                                                                                                                                                                                                                                                                                                                  |                             |
| 4.              | Have any of your close blood relatives (children, siblings, parents, aunts/uncles, grandparents, cousins, great aunts/uncles) been diagnosed with any of the following cancers? | <input checked="" type="checkbox"/> <b>Breast</b> <input type="checkbox"/> Uterine/ Endometrial <input checked="" type="checkbox"/> <b>Ovarian</b><br><input type="checkbox"/> Cervical <input type="checkbox"/> Colon <input type="checkbox"/> Pancreas <input type="checkbox"/> Prostate<br><input type="checkbox"/> Melanoma <input type="checkbox"/> Sarcoma <input type="checkbox"/> Gastric <input type="checkbox"/> Kidney<br><input type="checkbox"/> Leukemia <input type="checkbox"/> Brain tumor<br><input type="checkbox"/> Adrenal cortical carcinoma <input type="checkbox"/> Thyroid<br><input type="checkbox"/> Origin of the cancer is unknown <input type="checkbox"/> No |                             |
| 4.1.            | Which relatives have been diagnosed with breast cancer?                                                                                                                         | <input checked="" type="checkbox"/> <b>Mother</b> <input type="checkbox"/> Father <input type="checkbox"/> Sister <input type="checkbox"/> Brother <input type="checkbox"/> Daughter<br><input type="checkbox"/> Son <input type="checkbox"/> Grandmother <input type="checkbox"/> Grandfather <input type="checkbox"/> Aunt<br><input type="checkbox"/> Uncle <input type="checkbox"/> Nephew <input type="checkbox"/> Niece <input type="checkbox"/> First Cousin<br><input type="checkbox"/> Great Aunt <input type="checkbox"/> Great Uncle                                                                                                                                             |                             |

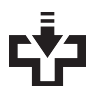

# Family Medicine Cancer Screening

Questionnaire last updated at: 09:27 AM EDT / 27 June 2018

 **Thomas Tester**  
MRN: 12344343344

|         |                                                                                       |                                                                                                                                                                                                                                                                                  |
|---------|---------------------------------------------------------------------------------------|----------------------------------------------------------------------------------------------------------------------------------------------------------------------------------------------------------------------------------------------------------------------------------|
| 4.1.1.  | What age was your mother diagnosed with breast cancer?                                | <input type="checkbox"/> Age 45 and younger <input checked="" type="checkbox"/> Age 46 - 50<br><input type="checkbox"/> Age 51 and older <input type="checkbox"/> Unsure                                                                                                         |
| 4.1.2.  | Do you have a sister diagnosed with breast cancer under or at the age of 45?          | <input type="checkbox"/> Yes <input type="checkbox"/> No <input type="checkbox"/> Unsure                                                                                                                                                                                         |
| 4.1.3.  | Do you have a sister diagnosed with breast cancer between the ages of 46-50?          | <input type="checkbox"/> Yes <input type="checkbox"/> No <input type="checkbox"/> Unsure                                                                                                                                                                                         |
| 4.1.4.  | How many sisters have been diagnosed with breast cancer?                              | <input type="checkbox"/> 1 <input type="checkbox"/> 2 <input type="checkbox"/> 3 or more                                                                                                                                                                                         |
| 4.1.5.  | Do you have a daughter diagnosed with breast cancer between the ages of 46-50?        | <input type="checkbox"/> Yes <input type="checkbox"/> No <input type="checkbox"/> Unsure                                                                                                                                                                                         |
| 4.1.6.  | How many daughters have been diagnosed with breast cancer?                            | <input type="checkbox"/> 1 <input type="checkbox"/> 2 <input type="checkbox"/> 3 or more                                                                                                                                                                                         |
| 4.1.7.  | Do you have a daughter diagnosed with breast cancer under or at the age of 45?        | <input type="checkbox"/> Yes <input type="checkbox"/> No <input type="checkbox"/> Unsure                                                                                                                                                                                         |
| 4.1.8.  | Do you have a grandmother diagnosed with breast cancer under or at the age of 45?     | <input type="checkbox"/> Yes <input type="checkbox"/> No <input type="checkbox"/> Unsure                                                                                                                                                                                         |
| 4.1.9.  | Do you have a grandmother diagnosed with breast cancer between the ages of 46-50?     | <input type="checkbox"/> Yes <input type="checkbox"/> No <input type="checkbox"/> Unsure                                                                                                                                                                                         |
| 4.1.10. | How many grandmothers have been diagnosed with breast cancer?                         | <input type="checkbox"/> 1 <input type="checkbox"/> 2 <input type="checkbox"/> 3 or more                                                                                                                                                                                         |
| 4.1.11. | Do you have any aunts diagnosed with breast cancer between the ages of 46-50?         | <input type="checkbox"/> Yes <input type="checkbox"/> No <input type="checkbox"/> Unsure                                                                                                                                                                                         |
| 4.1.12. | Do you have any aunts diagnosed with breast cancer under or at the age of 45?         | <input type="checkbox"/> Yes <input type="checkbox"/> No <input type="checkbox"/> Unsure                                                                                                                                                                                         |
| 4.1.13. | How many aunts have been diagnosed with breast cancer?                                | <input type="checkbox"/> 1 <input type="checkbox"/> 2 <input type="checkbox"/> 3 or more                                                                                                                                                                                         |
| 4.1.14. | Do you have any nieces diagnosed with breast cancer under or at the age of 45?        | <input type="checkbox"/> Yes <input type="checkbox"/> No <input type="checkbox"/> Unsure                                                                                                                                                                                         |
| 4.1.15. | Do you have any nieces diagnosed with breast cancer between the ages of 46-50?        | <input type="checkbox"/> Yes <input type="checkbox"/> No <input type="checkbox"/> Unsure                                                                                                                                                                                         |
| 4.1.16. | How many nieces have been diagnosed with breast cancer?                               | <input type="checkbox"/> 1 <input type="checkbox"/> 2 <input type="checkbox"/> 3 or more                                                                                                                                                                                         |
| 4.1.17. | Do you have any first cousins diagnosed with breast cancer between the ages of 46-50? | <input type="checkbox"/> Yes <input type="checkbox"/> No <input type="checkbox"/> Unsure                                                                                                                                                                                         |
| 4.1.18. | Do you have any first cousins diagnosed with breast cancer under or at the age of 45? | <input type="checkbox"/> Yes <input type="checkbox"/> No <input type="checkbox"/> Unsure                                                                                                                                                                                         |
| 4.1.19. | How many first cousins have been diagnosed with breast cancer?                        | <input type="checkbox"/> 1 <input type="checkbox"/> 2 <input type="checkbox"/> 3 or more                                                                                                                                                                                         |
| 4.1.20. | Do you have any great aunts diagnosed with breast cancer under or at the age of 45?   | <input type="checkbox"/> Yes <input type="checkbox"/> No <input type="checkbox"/> Unsure                                                                                                                                                                                         |
| 4.1.21. | Do you have any great aunts diagnosed with breast cancer between the ages of 46-50?   | <input type="checkbox"/> Yes <input type="checkbox"/> No <input type="checkbox"/> Unsure                                                                                                                                                                                         |
| 4.1.22. | How many great aunts have been diagnosed with breast cancer?                          | <input type="checkbox"/> 1 <input type="checkbox"/> 2 <input type="checkbox"/> 3 or more                                                                                                                                                                                         |
| 4.2.    | Which relatives have been diagnosed with uterine cancer?                              | <input type="checkbox"/> Mother <input type="checkbox"/> Sister <input type="checkbox"/> Daughter <input type="checkbox"/> Grandmother<br><input type="checkbox"/> Aunt <input type="checkbox"/> First Cousin <input type="checkbox"/> Great Aunt <input type="checkbox"/> Niece |
| 4.2.1.  | What age was your mother diagnosed?                                                   | <input type="checkbox"/> Age 50 and younger <input type="checkbox"/> Age 51 and older                                                                                                                                                                                            |



# Family Medicine Cancer Screening

Questionnaire last updated at: 09:27 AM EDT / 27 June 2018

 **Thomas Tester**  
MRN: 12344343344

|         |                                                                                         |                                                                                                                                                                                                                                                                                                                                                                                                                                                                                                                               |
|---------|-----------------------------------------------------------------------------------------|-------------------------------------------------------------------------------------------------------------------------------------------------------------------------------------------------------------------------------------------------------------------------------------------------------------------------------------------------------------------------------------------------------------------------------------------------------------------------------------------------------------------------------|
| 4.2.2.  | Were any of your sisters diagnosed with uterine cancer under or at the age of 50?       | <input type="checkbox"/> Yes <input type="checkbox"/> No <input type="checkbox"/> Unsure                                                                                                                                                                                                                                                                                                                                                                                                                                      |
| 4.2.3.  | How many of your sisters have been diagnosed with uterine cancer?                       | <input type="checkbox"/> 1 <input type="checkbox"/> 2 <input type="checkbox"/> 3 or more                                                                                                                                                                                                                                                                                                                                                                                                                                      |
| 4.2.4.  | Were any of your daughters diagnosed with uterine cancer under or at the age of 50?     | <input type="checkbox"/> Yes <input type="checkbox"/> No <input type="checkbox"/> Unsure                                                                                                                                                                                                                                                                                                                                                                                                                                      |
| 4.2.5.  | How many of your daughters have been diagnosed with uterine cancer?                     | <input type="checkbox"/> 1 <input type="checkbox"/> 2 <input type="checkbox"/> 3 or more                                                                                                                                                                                                                                                                                                                                                                                                                                      |
| 4.2.6.  | Were any of your grandmothers diagnosed with uterine cancer under or at the age of 50?  | <input type="checkbox"/> Yes <input type="checkbox"/> No <input type="checkbox"/> Unsure                                                                                                                                                                                                                                                                                                                                                                                                                                      |
| 4.2.7.  | How many of your grandmothers have been diagnosed with uterine cancer?                  | <input type="checkbox"/> 1 <input type="checkbox"/> 2 <input type="checkbox"/> 3 or more                                                                                                                                                                                                                                                                                                                                                                                                                                      |
| 4.2.8.  | Were any of your aunts diagnosed with uterine cancer under or at the age of 50?         | <input type="checkbox"/> Yes <input type="checkbox"/> No <input type="checkbox"/> Unsure                                                                                                                                                                                                                                                                                                                                                                                                                                      |
| 4.2.9.  | How many of your aunts have been diagnosed with uterine cancer?                         | <input type="checkbox"/> 1 <input type="checkbox"/> 2 <input type="checkbox"/> 3 or more                                                                                                                                                                                                                                                                                                                                                                                                                                      |
| 4.2.10. | Were any of your first cousins diagnosed with uterine cancer under or at the age of 50? | <input type="checkbox"/> Yes <input type="checkbox"/> No <input type="checkbox"/> Unsure                                                                                                                                                                                                                                                                                                                                                                                                                                      |
| 4.2.11. | How many of your first cousins have been diagnosed with uterine cancer?                 | <input type="checkbox"/> 1 <input type="checkbox"/> 2 <input type="checkbox"/> 3 or more                                                                                                                                                                                                                                                                                                                                                                                                                                      |
| 4.2.12. | Were any of your great aunts diagnosed with uterine cancer under or at the age of 50?   | <input type="checkbox"/> Yes <input type="checkbox"/> No <input type="checkbox"/> Unsure                                                                                                                                                                                                                                                                                                                                                                                                                                      |
| 4.2.13. | How many of your great aunts have been diagnosed with uterine cancer?                   | <input type="checkbox"/> 1 <input type="checkbox"/> 2 <input type="checkbox"/> 3 or more                                                                                                                                                                                                                                                                                                                                                                                                                                      |
| 4.2.14. | Were any of your nieces diagnosed with uterine cancer under or at the age of 50?        | <input type="checkbox"/> Yes <input type="checkbox"/> No <input type="checkbox"/> Unsure                                                                                                                                                                                                                                                                                                                                                                                                                                      |
| 4.2.15. | How many of your nieces have been diagnosed with uterine cancer?                        | <input type="checkbox"/> 1 <input type="checkbox"/> 2 <input type="checkbox"/> 3 or more                                                                                                                                                                                                                                                                                                                                                                                                                                      |
| 4.3.    | Which relatives have been diagnosed with ovarian cancer?                                | <input checked="" type="checkbox"/> <b>Mother</b> <input type="checkbox"/> Sister <input type="checkbox"/> Daughter <input type="checkbox"/> Grandmother<br><input type="checkbox"/> Aunt <input type="checkbox"/> First Cousin <input type="checkbox"/> Great Aunt <input type="checkbox"/> Niece                                                                                                                                                                                                                            |
| 4.3.1.  | How many sisters have been diagnosed with ovarian cancer?                               | <input type="checkbox"/> 1 <input type="checkbox"/> 2 <input type="checkbox"/> 3 or more                                                                                                                                                                                                                                                                                                                                                                                                                                      |
| 4.3.2.  | How many daughters have been diagnosed with ovarian cancer?                             | <input type="checkbox"/> 1 <input type="checkbox"/> 2 <input type="checkbox"/> 3 or more                                                                                                                                                                                                                                                                                                                                                                                                                                      |
| 4.3.3.  | How many grandmothers have been diagnosed with ovarian cancer?                          | <input type="checkbox"/> 1 <input type="checkbox"/> 2 <input type="checkbox"/> 3 or more                                                                                                                                                                                                                                                                                                                                                                                                                                      |
| 4.3.4.  | How many aunts have been diagnosed with ovarian cancer?                                 | <input type="checkbox"/> 1 <input type="checkbox"/> 2 <input type="checkbox"/> 3 or more                                                                                                                                                                                                                                                                                                                                                                                                                                      |
| 4.3.5.  | How many first cousins have been diagnosed with ovarian cancer?                         | <input type="checkbox"/> 1 <input type="checkbox"/> 2 <input type="checkbox"/> 3 or more                                                                                                                                                                                                                                                                                                                                                                                                                                      |
| 4.3.6.  | How many great aunts have been diagnosed with ovarian cancer?                           | <input type="checkbox"/> 1 <input type="checkbox"/> 2 <input type="checkbox"/> 3 or more                                                                                                                                                                                                                                                                                                                                                                                                                                      |
| 4.3.7.  | How many nieces have been diagnosed with ovarian cancer?                                | <input type="checkbox"/> 1 <input type="checkbox"/> 2 <input type="checkbox"/> 3 or more                                                                                                                                                                                                                                                                                                                                                                                                                                      |
| 4.4.    | Which relatives have been diagnosed with colon cancer?                                  | <input type="checkbox"/> Mother <input type="checkbox"/> Father <input type="checkbox"/> Sister <input type="checkbox"/> Brother <input type="checkbox"/> Daughter<br><input type="checkbox"/> Son <input type="checkbox"/> Grandmother <input type="checkbox"/> Grandfather <input type="checkbox"/> Aunt<br><input type="checkbox"/> Uncle <input type="checkbox"/> First cousin <input type="checkbox"/> Great Aunt <input type="checkbox"/> Great Uncle<br><input type="checkbox"/> Niece <input type="checkbox"/> Nephew |



# Family Medicine Cancer Screening

Questionnaire last updated at: 09:27 AM EDT / 27 June 2018

 **Thomas Tester**  
MRN: 12344343344

|         |                                                                                      |                                                                                                                                                             |
|---------|--------------------------------------------------------------------------------------|-------------------------------------------------------------------------------------------------------------------------------------------------------------|
| 4.4.1.  | What age was your mother diagnosed?                                                  | <input type="checkbox"/> Age 50 and younger <input type="checkbox"/> Age 51-60<br><input type="checkbox"/> Age 61 and older <input type="checkbox"/> Unsure |
| 4.4.2.  | What age was your father diagnosed?                                                  | <input type="checkbox"/> Age 50 and younger <input type="checkbox"/> Age 51-60<br><input type="checkbox"/> Age 61 and older <input type="checkbox"/> Unsure |
| 4.4.3.  | Do you have a sister diagnosed with colon cancer under or at the age of 50?          | <input type="checkbox"/> Yes <input type="checkbox"/> No <input type="checkbox"/> Unsure                                                                    |
| 4.4.4.  | Do you have a sister diagnosed with colon cancer between the ages of 51-60?          | <input type="checkbox"/> Yes <input type="checkbox"/> No <input type="checkbox"/> Unsure                                                                    |
| 4.4.5.  | How many sisters have been diagnosed with colon cancer?                              | <input type="checkbox"/> 1 <input type="checkbox"/> 2 <input type="checkbox"/> 3 or more                                                                    |
| 4.4.6.  | Do you have a brother diagnosed with colon cancer under or at the age of 50?         | <input type="checkbox"/> Yes <input type="checkbox"/> No <input type="checkbox"/> Unsure                                                                    |
| 4.4.7.  | Do you have a brother diagnosed with colon cancer between the ages of 51-60?         | <input type="checkbox"/> Yes <input type="checkbox"/> No <input type="checkbox"/> Unsure                                                                    |
| 4.4.8.  | How many brothers have been diagnosed with colon cancer?                             | <input type="checkbox"/> 1 <input type="checkbox"/> 2 <input type="checkbox"/> 3 or more                                                                    |
| 4.4.9.  | Do you have a daughter diagnosed with colon cancer under or at the age of 50?        | <input type="checkbox"/> Yes <input type="checkbox"/> No <input type="checkbox"/> Unsure                                                                    |
| 4.4.10. | Do you have a daughter diagnosed with colon cancer between the ages of 51-60?        | <input type="checkbox"/> Yes <input type="checkbox"/> No <input type="checkbox"/> Unsure                                                                    |
| 4.4.11. | How many daughters have been diagnosed with colon cancer?                            | <input type="checkbox"/> 1 <input type="checkbox"/> 2 <input type="checkbox"/> 3 or more                                                                    |
| 4.4.12. | Do you have a son diagnosed with colon cancer under or at the age of 50?             | <input type="checkbox"/> Yes <input type="checkbox"/> No <input type="checkbox"/> Unsure                                                                    |
| 4.4.13. | Do you have a son diagnosed with colon cancer between the ages of 51-60?             | <input type="checkbox"/> Yes <input type="checkbox"/> No <input type="checkbox"/> Unsure                                                                    |
| 4.4.14. | How many sons have been diagnosed with colon cancer?                                 | <input type="checkbox"/> 1 <input type="checkbox"/> 2 <input type="checkbox"/> 3 or more                                                                    |
| 4.4.15. | Do you have any grandmothers diagnosed with colon cancer under or at the age of 50?  | <input type="checkbox"/> Yes <input type="checkbox"/> No <input type="checkbox"/> Unsure                                                                    |
| 4.4.16. | How many grandmothers have been diagnosed with colon cancer?                         | <input type="checkbox"/> 1 <input type="checkbox"/> 2 <input type="checkbox"/> 3 or more                                                                    |
| 4.4.17. | Do you have any grandfathers diagnosed with colon cancer under or at the age of 50?  | <input type="checkbox"/> Yes <input type="checkbox"/> No <input type="checkbox"/> Unsure                                                                    |
| 4.4.18. | How many grandfathers have been diagnosed with colon cancer?                         | <input type="checkbox"/> 1 <input type="checkbox"/> 2 <input type="checkbox"/> 3 or more                                                                    |
| 4.4.19. | Do you have any aunts diagnosed with colon cancer under or at the age of 50?         | <input type="checkbox"/> Yes <input type="checkbox"/> No <input type="checkbox"/> Unsure                                                                    |
| 4.4.20. | How many aunts have been diagnosed with colon cancer?                                | <input type="checkbox"/> 1 <input type="checkbox"/> 2 <input type="checkbox"/> 3 or more                                                                    |
| 4.4.21. | Do you have any uncles diagnosed with colon cancer under or at the age of 50?        | <input type="checkbox"/> Yes <input type="checkbox"/> No <input type="checkbox"/> Unsure                                                                    |
| 4.4.22. | How many uncles have been diagnosed with colon cancer?                               | <input type="checkbox"/> 1 <input type="checkbox"/> 2 <input type="checkbox"/> 3 or more                                                                    |
| 4.4.23. | Do you have any first cousins diagnosed with colon cancer under or at the age of 50? | <input type="checkbox"/> Yes <input type="checkbox"/> No <input type="checkbox"/> Unsure                                                                    |
| 4.4.24. | How many first cousins have been diagnosed with colon cancer?                        | <input type="checkbox"/> 1 <input type="checkbox"/> 2 <input type="checkbox"/> 3 or more                                                                    |



# Family Medicine Cancer Screening

Questionnaire last updated at: 09:27 AM EDT / 27 June 2018

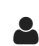

**Thomas Tester**

MRN: 12344343344

|         |                                                                                     |                                                                                                                                                                                                                                                                                                                                                                                                                                                                                                                               |
|---------|-------------------------------------------------------------------------------------|-------------------------------------------------------------------------------------------------------------------------------------------------------------------------------------------------------------------------------------------------------------------------------------------------------------------------------------------------------------------------------------------------------------------------------------------------------------------------------------------------------------------------------|
| 4.4.25. | Do you have any great aunts diagnosed with colon cancer under or at the age of 50?  | <input type="checkbox"/> Yes <input type="checkbox"/> No <input type="checkbox"/> Unsure                                                                                                                                                                                                                                                                                                                                                                                                                                      |
| 4.4.26. | How many great aunts have been diagnosed with colon cancer?                         | <input type="checkbox"/> 1 <input type="checkbox"/> 2 <input type="checkbox"/> 3 or more                                                                                                                                                                                                                                                                                                                                                                                                                                      |
| 4.4.27. | Do you have any great uncles diagnosed with colon cancer under or at the age of 50? | <input type="checkbox"/> Yes <input type="checkbox"/> No <input type="checkbox"/> Unsure                                                                                                                                                                                                                                                                                                                                                                                                                                      |
| 4.4.28. | How many great uncles have been diagnosed with colon cancer?                        | <input type="checkbox"/> 1 <input type="checkbox"/> 2 <input type="checkbox"/> 3 or more                                                                                                                                                                                                                                                                                                                                                                                                                                      |
| 4.4.29. | Do you have any nieces diagnosed with colon cancer under or at the age of 50?       | <input type="checkbox"/> Yes <input type="checkbox"/> No <input type="checkbox"/> Unsure                                                                                                                                                                                                                                                                                                                                                                                                                                      |
| 4.4.30. | How many nieces have been diagnosed with colon cancer?                              | <input type="checkbox"/> 1 <input type="checkbox"/> 2 <input type="checkbox"/> 3 or more                                                                                                                                                                                                                                                                                                                                                                                                                                      |
| 4.4.31. | Do you have any nephews diagnosed with colon cancer under or at the age of 50?      | <input type="checkbox"/> Yes <input type="checkbox"/> No <input type="checkbox"/> Unsure                                                                                                                                                                                                                                                                                                                                                                                                                                      |
| 4.4.32. | How many nephews have been diagnosed with colon cancer?                             | <input type="checkbox"/> 1 <input type="checkbox"/> 2 <input type="checkbox"/> 3 or more                                                                                                                                                                                                                                                                                                                                                                                                                                      |
| 4.5.    | Which relatives have had melanoma?                                                  | <input type="checkbox"/> Mother <input type="checkbox"/> Father <input type="checkbox"/> Sister <input type="checkbox"/> Brother <input type="checkbox"/> Daughter<br><input type="checkbox"/> Son <input type="checkbox"/> Grandmother <input type="checkbox"/> Grandfather <input type="checkbox"/> Aunt<br><input type="checkbox"/> Uncle <input type="checkbox"/> First cousin <input type="checkbox"/> Great Aunt <input type="checkbox"/> Great Uncle<br><input type="checkbox"/> Niece <input type="checkbox"/> Nephew |
| 4.5.1.  | How many sisters have been diagnosed with melanoma?                                 | <input type="checkbox"/> 1 <input type="checkbox"/> 2 <input type="checkbox"/> 3 or more                                                                                                                                                                                                                                                                                                                                                                                                                                      |
| 4.5.2.  | How many brothers have been diagnosed with melanoma?                                | <input type="checkbox"/> 1 <input type="checkbox"/> 2 <input type="checkbox"/> 3 or more                                                                                                                                                                                                                                                                                                                                                                                                                                      |
| 4.5.3.  | How many daughters have been diagnosed with melanoma?                               | <input type="checkbox"/> 1 <input type="checkbox"/> 2 <input type="checkbox"/> 3 or more                                                                                                                                                                                                                                                                                                                                                                                                                                      |
| 4.5.4.  | How many sons have been diagnosed with melanoma?                                    | <input type="checkbox"/> 1 <input type="checkbox"/> 2 <input type="checkbox"/> 3 or more                                                                                                                                                                                                                                                                                                                                                                                                                                      |
| 4.5.5.  | How many grandmothers have been diagnosed with melanoma?                            | <input type="checkbox"/> 1 <input type="checkbox"/> 2 <input type="checkbox"/> 3 or more                                                                                                                                                                                                                                                                                                                                                                                                                                      |
| 4.5.6.  | How many grandfathers have been diagnosed with melanoma?                            | <input type="checkbox"/> 1 <input type="checkbox"/> 2 <input type="checkbox"/> 3 or more                                                                                                                                                                                                                                                                                                                                                                                                                                      |
| 4.5.7.  | How many aunts have been diagnosed with melanoma?                                   | <input type="checkbox"/> 1 <input type="checkbox"/> 2 <input type="checkbox"/> 3 or more                                                                                                                                                                                                                                                                                                                                                                                                                                      |
| 4.5.8.  | How many uncles have been diagnosed with melanoma?                                  | <input type="checkbox"/> 1 <input type="checkbox"/> 2 <input type="checkbox"/> 3 or more                                                                                                                                                                                                                                                                                                                                                                                                                                      |
| 4.5.9.  | How many first cousins have been diagnosed with melanoma?                           | <input type="checkbox"/> 1 <input type="checkbox"/> 2 <input type="checkbox"/> 3 or more                                                                                                                                                                                                                                                                                                                                                                                                                                      |
| 4.5.10. | How many great aunts have been diagnosed with melanoma?                             | <input type="checkbox"/> 1 <input type="checkbox"/> 2 <input type="checkbox"/> 3 or more                                                                                                                                                                                                                                                                                                                                                                                                                                      |
| 4.5.11. | How many great uncles have been diagnosed with melanoma?                            | <input type="checkbox"/> 1 <input type="checkbox"/> 2 <input type="checkbox"/> 3 or more                                                                                                                                                                                                                                                                                                                                                                                                                                      |
| 4.5.12. | How many nieces have been diagnosed with melanoma?                                  | <input type="checkbox"/> 1 <input type="checkbox"/> 2 <input type="checkbox"/> 3 or more                                                                                                                                                                                                                                                                                                                                                                                                                                      |
| 4.5.13. | How many nephews have been diagnosed with melanoma?                                 | <input type="checkbox"/> 1 <input type="checkbox"/> 2 <input type="checkbox"/> 3 or more                                                                                                                                                                                                                                                                                                                                                                                                                                      |
| 4.6.    | Which relatives have been diagnosed with sarcoma?                                   | <input type="checkbox"/> Mother <input type="checkbox"/> Father <input type="checkbox"/> Sister <input type="checkbox"/> Brother <input type="checkbox"/> Daughter<br><input type="checkbox"/> Son <input type="checkbox"/> Grandmother <input type="checkbox"/> Grandfather <input type="checkbox"/> Aunt<br><input type="checkbox"/> Uncle <input type="checkbox"/> First Cousin <input type="checkbox"/> Great Aunt <input type="checkbox"/> Great Uncle<br><input type="checkbox"/> Niece <input type="checkbox"/> Nephew |
| 4.6.1.  | How many sisters have been diagnosed with sarcoma?                                  | <input type="checkbox"/> 1 <input type="checkbox"/> 2 <input type="checkbox"/> 3 or more                                                                                                                                                                                                                                                                                                                                                                                                                                      |



# Family Medicine Cancer Screening

Questionnaire last updated at: 09:27 AM EDT / 27 June 2018

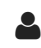

**Thomas Tester**  
MRN: 12344343344

|         |                                                                 |                                                                                                                                                                                                                                                                                                                                                                                                                                                                                                                               |
|---------|-----------------------------------------------------------------|-------------------------------------------------------------------------------------------------------------------------------------------------------------------------------------------------------------------------------------------------------------------------------------------------------------------------------------------------------------------------------------------------------------------------------------------------------------------------------------------------------------------------------|
| 4.6.2.  | How many brothers have been diagnosed with sarcoma?             | <input type="checkbox"/> 1 <input type="checkbox"/> 2 <input type="checkbox"/> 3 or more                                                                                                                                                                                                                                                                                                                                                                                                                                      |
| 4.6.3.  | How many daughters have been diagnosed with sarcoma?            | <input type="checkbox"/> 1 <input type="checkbox"/> 2 <input type="checkbox"/> 3 or more                                                                                                                                                                                                                                                                                                                                                                                                                                      |
| 4.6.4.  | How many sons have been diagnosed with sarcoma?                 | <input type="checkbox"/> 1 <input type="checkbox"/> 2 <input type="checkbox"/> 3 or more                                                                                                                                                                                                                                                                                                                                                                                                                                      |
| 4.6.5.  | How many grandmothers have been diagnosed with sarcoma?         | <input type="checkbox"/> 1 <input type="checkbox"/> 2 <input type="checkbox"/> 3 or more                                                                                                                                                                                                                                                                                                                                                                                                                                      |
| 4.6.6.  | How many grandfathers have been diagnosed with sarcoma?         | <input type="checkbox"/> 1 <input type="checkbox"/> 2 <input type="checkbox"/> 3 or more                                                                                                                                                                                                                                                                                                                                                                                                                                      |
| 4.6.7.  | How many aunts have been diagnosed with sarcoma?                | <input type="checkbox"/> 1 <input type="checkbox"/> 2 <input type="checkbox"/> 3 or more                                                                                                                                                                                                                                                                                                                                                                                                                                      |
| 4.6.8.  | How many uncles have been diagnosed with sarcoma?               | <input type="checkbox"/> 1 <input type="checkbox"/> 2 <input type="checkbox"/> 3 or more                                                                                                                                                                                                                                                                                                                                                                                                                                      |
| 4.6.9.  | How many first cousins have been diagnosed with sarcoma?        | <input type="checkbox"/> 1 <input type="checkbox"/> 2 <input type="checkbox"/> 3 or more                                                                                                                                                                                                                                                                                                                                                                                                                                      |
| 4.6.10. | How many great aunts have been diagnosed with sarcoma?          | <input type="checkbox"/> 1 <input type="checkbox"/> 2 <input type="checkbox"/> 3 or more                                                                                                                                                                                                                                                                                                                                                                                                                                      |
| 4.6.11. | How many great uncles have been diagnosed with sarcoma?         | <input type="checkbox"/> 1 <input type="checkbox"/> 2 <input type="checkbox"/> 3 or more                                                                                                                                                                                                                                                                                                                                                                                                                                      |
| 4.6.12. | How many nieces have been diagnosed with sarcoma?               | <input type="checkbox"/> 1 <input type="checkbox"/> 2 <input type="checkbox"/> 3 or more                                                                                                                                                                                                                                                                                                                                                                                                                                      |
| 4.6.13. | How many nephews have been diagnosed with sarcoma?              | <input type="checkbox"/> 1 <input type="checkbox"/> 2 <input type="checkbox"/> 3 or more                                                                                                                                                                                                                                                                                                                                                                                                                                      |
| 4.7.    | Which relatives have been diagnosed with gastric cancer?        | <input type="checkbox"/> Mother <input type="checkbox"/> Father <input type="checkbox"/> Sister <input type="checkbox"/> Brother <input type="checkbox"/> Daughter<br><input type="checkbox"/> Son <input type="checkbox"/> Grandmother <input type="checkbox"/> Grandfather <input type="checkbox"/> Aunt<br><input type="checkbox"/> Uncle <input type="checkbox"/> First Cousin <input type="checkbox"/> Great Aunt <input type="checkbox"/> Great Uncle<br><input type="checkbox"/> Niece <input type="checkbox"/> Nephew |
| 4.7.1.  | How many sisters have been diagnosed with gastric cancer?       | <input type="checkbox"/> 1 <input type="checkbox"/> 2 <input type="checkbox"/> 3 or more                                                                                                                                                                                                                                                                                                                                                                                                                                      |
| 4.7.2.  | How many brothers have been diagnosed with gastric cancer?      | <input type="checkbox"/> 1 <input type="checkbox"/> 2 <input type="checkbox"/> 3 or more                                                                                                                                                                                                                                                                                                                                                                                                                                      |
| 4.7.3.  | How many daughters have been diagnosed with gastric cancer?     | <input type="checkbox"/> 1 <input type="checkbox"/> 2 <input type="checkbox"/> 3 or more                                                                                                                                                                                                                                                                                                                                                                                                                                      |
| 4.7.4.  | How many sons have been diagnosed with gastric cancer?          | <input type="checkbox"/> 1 <input type="checkbox"/> 2 <input type="checkbox"/> 3 or more                                                                                                                                                                                                                                                                                                                                                                                                                                      |
| 4.7.5.  | How many grandmothers have been diagnosed with gastric cancer?  | <input type="checkbox"/> 1 <input type="checkbox"/> 2 <input type="checkbox"/> 3 or more                                                                                                                                                                                                                                                                                                                                                                                                                                      |
| 4.7.6.  | How many grandfathers have been diagnosed with gastric cancer?  | <input type="checkbox"/> 1 <input type="checkbox"/> 2 <input type="checkbox"/> 3 or more                                                                                                                                                                                                                                                                                                                                                                                                                                      |
| 4.7.7.  | How many aunts have been diagnosed with gastric cancer?         | <input type="checkbox"/> 1 <input type="checkbox"/> 2 <input type="checkbox"/> 3 or more                                                                                                                                                                                                                                                                                                                                                                                                                                      |
| 4.7.8.  | How many uncles have been diagnosed with gastric cancer?        | <input type="checkbox"/> 1 <input type="checkbox"/> 2 <input type="checkbox"/> 3 or more                                                                                                                                                                                                                                                                                                                                                                                                                                      |
| 4.7.9.  | How many first cousins have been diagnosed with gastric cancer? | <input type="checkbox"/> 1 <input type="checkbox"/> 2 <input type="checkbox"/> 3 or more                                                                                                                                                                                                                                                                                                                                                                                                                                      |
| 4.7.10. | How many great aunts have been diagnosed with gastric cancer?   | <input type="checkbox"/> 1 <input type="checkbox"/> 2 <input type="checkbox"/> 3 or more                                                                                                                                                                                                                                                                                                                                                                                                                                      |
| 4.7.11. | How many great uncles have been diagnosed with gastric cancer?  | <input type="checkbox"/> 1 <input type="checkbox"/> 2 <input type="checkbox"/> 3 or more                                                                                                                                                                                                                                                                                                                                                                                                                                      |
| 4.7.12. | How many nieces have been diagnosed with gastric cancer?        | <input type="checkbox"/> 1 <input type="checkbox"/> 2 <input type="checkbox"/> 3 or more                                                                                                                                                                                                                                                                                                                                                                                                                                      |

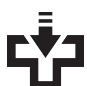

# Family Medicine Cancer Screening

Questionnaire last updated at: 09:27 AM EDT / 27 June 2018



**Thomas Tester**  
MRN: 12344343344

|         |                                                                |                                                                                                                                                                                                                                                                                                                                                                                                                                                                                                                               |
|---------|----------------------------------------------------------------|-------------------------------------------------------------------------------------------------------------------------------------------------------------------------------------------------------------------------------------------------------------------------------------------------------------------------------------------------------------------------------------------------------------------------------------------------------------------------------------------------------------------------------|
| 4.7.13. | How many nephews have been diagnosed with gastric cancer?      | <input type="checkbox"/> 1 <input type="checkbox"/> 2 <input type="checkbox"/> 3 or more                                                                                                                                                                                                                                                                                                                                                                                                                                      |
| 4.8.    | Which relatives have been diagnosed with kidney cancer?        | <input type="checkbox"/> Mother <input type="checkbox"/> Father <input type="checkbox"/> Sister <input type="checkbox"/> Brother <input type="checkbox"/> Daughter<br><input type="checkbox"/> Son <input type="checkbox"/> Grandmother <input type="checkbox"/> Grandfather <input type="checkbox"/> Aunt<br><input type="checkbox"/> Uncle <input type="checkbox"/> First Cousin <input type="checkbox"/> Great Aunt <input type="checkbox"/> Great Uncle<br><input type="checkbox"/> Niece <input type="checkbox"/> Nephew |
| 4.8.1.  | How many sisters have been diagnosed with kidney cancer?       | <input type="checkbox"/> 1 <input type="checkbox"/> 2 <input type="checkbox"/> 3 or more                                                                                                                                                                                                                                                                                                                                                                                                                                      |
| 4.8.2.  | How many brothers have been diagnosed with kidney cancer?      | <input type="checkbox"/> 1 <input type="checkbox"/> 2 <input type="checkbox"/> 3 or more                                                                                                                                                                                                                                                                                                                                                                                                                                      |
| 4.8.3.  | How many daughters have been diagnosed with kidney cancer?     | <input type="checkbox"/> 1 <input type="checkbox"/> 2 <input type="checkbox"/> 3 or more                                                                                                                                                                                                                                                                                                                                                                                                                                      |
| 4.8.4.  | How many sons have been diagnosed with kidney cancer?          | <input type="checkbox"/> 1 <input type="checkbox"/> 2 <input type="checkbox"/> 3 or more                                                                                                                                                                                                                                                                                                                                                                                                                                      |
| 4.8.5.  | How many grandmothers have been diagnosed with kidney cancer?  | <input type="checkbox"/> 1 <input type="checkbox"/> 2 <input type="checkbox"/> 3 or more                                                                                                                                                                                                                                                                                                                                                                                                                                      |
| 4.8.6.  | How many grandfathers have been diagnosed with kidney cancer?  | <input type="checkbox"/> 1 <input type="checkbox"/> 2 <input type="checkbox"/> 3 or more                                                                                                                                                                                                                                                                                                                                                                                                                                      |
| 4.8.7.  | How many aunts have been diagnosed with kidney cancer?         | <input type="checkbox"/> 1 <input type="checkbox"/> 2 <input type="checkbox"/> 3 or more                                                                                                                                                                                                                                                                                                                                                                                                                                      |
| 4.8.8.  | How many uncles have been diagnosed with kidney cancer?        | <input type="checkbox"/> 1 <input type="checkbox"/> 2 <input type="checkbox"/> 3 or more                                                                                                                                                                                                                                                                                                                                                                                                                                      |
| 4.8.9.  | How many first cousins have been diagnosed with kidney cancer? | <input type="checkbox"/> 1 <input type="checkbox"/> 2 <input type="checkbox"/> 3 or more                                                                                                                                                                                                                                                                                                                                                                                                                                      |
| 4.8.10. | How many great aunts have been diagnosed with kidney cancer?   | <input type="checkbox"/> 1 <input type="checkbox"/> 2 <input type="checkbox"/> 3 or more                                                                                                                                                                                                                                                                                                                                                                                                                                      |
| 4.8.11. | How many great uncles have been diagnosed with kidney cancer?  | <input type="checkbox"/> 1 <input type="checkbox"/> 2 <input type="checkbox"/> 3 or more                                                                                                                                                                                                                                                                                                                                                                                                                                      |
| 4.8.12. | How many nieces have been diagnosed with kidney cancer?        | <input type="checkbox"/> 1 <input type="checkbox"/> 2 <input type="checkbox"/> 3 or more                                                                                                                                                                                                                                                                                                                                                                                                                                      |
| 4.8.13. | How many nephews have been diagnosed with kidney cancer?       | <input type="checkbox"/> 1 <input type="checkbox"/> 2 <input type="checkbox"/> 3 or more                                                                                                                                                                                                                                                                                                                                                                                                                                      |
| 4.9.    | Which relatives have been diagnosed with leukemia?             | <input type="checkbox"/> Mother <input type="checkbox"/> Father <input type="checkbox"/> Sister <input type="checkbox"/> Brother <input type="checkbox"/> Daughter<br><input type="checkbox"/> Son <input type="checkbox"/> Grandmother <input type="checkbox"/> Grandfather <input type="checkbox"/> Aunt<br><input type="checkbox"/> Uncle <input type="checkbox"/> First Cousin <input type="checkbox"/> Great Aunt <input type="checkbox"/> Great Uncle<br><input type="checkbox"/> Niece <input type="checkbox"/> Nephew |
| 4.9.1.  | How many sisters have been diagnosed with leukemia?            | <input type="checkbox"/> 1 <input type="checkbox"/> 2 <input type="checkbox"/> 3 or more                                                                                                                                                                                                                                                                                                                                                                                                                                      |
| 4.9.2.  | How many brothers have been diagnosed with leukemia?           | <input type="checkbox"/> 1 <input type="checkbox"/> 2 <input type="checkbox"/> 3 or more                                                                                                                                                                                                                                                                                                                                                                                                                                      |
| 4.9.3.  | How many daughters have been diagnosed with leukemia?          | <input type="checkbox"/> 1 <input type="checkbox"/> 2 <input type="checkbox"/> 3 or more                                                                                                                                                                                                                                                                                                                                                                                                                                      |
| 4.9.4.  | How many sons have been diagnosed with leukemia?               | <input type="checkbox"/> 1 <input type="checkbox"/> 2 <input type="checkbox"/> 3 or more                                                                                                                                                                                                                                                                                                                                                                                                                                      |
| 4.9.5.  | How many grandmothers have been diagnosed with leukemia?       | <input type="checkbox"/> 1 <input type="checkbox"/> 2 <input type="checkbox"/> 3 or more                                                                                                                                                                                                                                                                                                                                                                                                                                      |
| 4.9.6.  | How many grandfathers have been diagnosed with leukemia?       | <input type="checkbox"/> 1 <input type="checkbox"/> 2 <input type="checkbox"/> 3 or more                                                                                                                                                                                                                                                                                                                                                                                                                                      |
| 4.9.7.  | How many aunts have been diagnosed with leukemia?              | <input type="checkbox"/> 1 <input type="checkbox"/> 2 <input type="checkbox"/> 3 or more                                                                                                                                                                                                                                                                                                                                                                                                                                      |
| 4.9.8.  | How many uncles have been diagnosed with leukemia?             | <input type="checkbox"/> 1 <input type="checkbox"/> 2 <input type="checkbox"/> 3 or more                                                                                                                                                                                                                                                                                                                                                                                                                                      |



# Family Medicine Cancer Screening

Questionnaire last updated at: 09:27 AM EDT / 27 June 2018



Thomas Tester

MRN: 12344343344

|          |                                                                         |                                                                                                                                                                                                                                                                                                                                                                                                                                                                                                                               |
|----------|-------------------------------------------------------------------------|-------------------------------------------------------------------------------------------------------------------------------------------------------------------------------------------------------------------------------------------------------------------------------------------------------------------------------------------------------------------------------------------------------------------------------------------------------------------------------------------------------------------------------|
| 4.9.9.   | How many first cousins have been diagnosed with leukemia?               | <input type="checkbox"/> 1 <input type="checkbox"/> 2 <input type="checkbox"/> 3 or more                                                                                                                                                                                                                                                                                                                                                                                                                                      |
| 4.9.10.  | How many great aunts have been diagnosed with leukemia?                 | <input type="checkbox"/> 1 <input type="checkbox"/> 2 <input type="checkbox"/> 3 or more                                                                                                                                                                                                                                                                                                                                                                                                                                      |
| 4.9.11.  | How many great uncles have been diagnosed with leukemia?                | <input type="checkbox"/> 1 <input type="checkbox"/> 2 <input type="checkbox"/> 3 or more                                                                                                                                                                                                                                                                                                                                                                                                                                      |
| 4.9.12.  | How many nieces have been diagnosed with leukemia?                      | <input type="checkbox"/> 1 <input type="checkbox"/> 2 <input type="checkbox"/> 3 or more                                                                                                                                                                                                                                                                                                                                                                                                                                      |
| 4.9.13.  | How many nephews have been diagnosed with leukemia?                     | <input type="checkbox"/> 1 <input type="checkbox"/> 2 <input type="checkbox"/> 3 or more                                                                                                                                                                                                                                                                                                                                                                                                                                      |
| 4.10.    | Which relatives have been diagnosed with a brain tumor?                 | <input type="checkbox"/> Mother <input type="checkbox"/> Father <input type="checkbox"/> Sister <input type="checkbox"/> Brother <input type="checkbox"/> Daughter<br><input type="checkbox"/> Son <input type="checkbox"/> Grandmother <input type="checkbox"/> Grandfather <input type="checkbox"/> Aunt<br><input type="checkbox"/> Uncle <input type="checkbox"/> First Cousin <input type="checkbox"/> Great Aunt <input type="checkbox"/> Great Uncle<br><input type="checkbox"/> Niece <input type="checkbox"/> Nephew |
| 4.10.1.  | How many sisters have been diagnosed with a brain tumor?                | <input type="checkbox"/> 1 <input type="checkbox"/> 2 <input type="checkbox"/> 3 or more                                                                                                                                                                                                                                                                                                                                                                                                                                      |
| 4.10.2.  | How many brothers have been diagnosed with a brain tumor?               | <input type="checkbox"/> 1 <input type="checkbox"/> 2 <input type="checkbox"/> 3 or more                                                                                                                                                                                                                                                                                                                                                                                                                                      |
| 4.10.3.  | How many daughters have been diagnosed with a brain tumor?              | <input type="checkbox"/> 1 <input type="checkbox"/> 2 <input type="checkbox"/> 3 or more                                                                                                                                                                                                                                                                                                                                                                                                                                      |
| 4.10.4.  | How many sons have been diagnosed with a brain tumor?                   | <input type="checkbox"/> 1 <input type="checkbox"/> 2 <input type="checkbox"/> 3 or more                                                                                                                                                                                                                                                                                                                                                                                                                                      |
| 4.10.5.  | How many grandmothers have been diagnosed with a brain tumor?           | <input type="checkbox"/> 1 <input type="checkbox"/> 2 <input type="checkbox"/> 3 or more                                                                                                                                                                                                                                                                                                                                                                                                                                      |
| 4.10.6.  | How many grandfathers have been diagnosed with a brain tumor?           | <input type="checkbox"/> 1 <input type="checkbox"/> 2 <input type="checkbox"/> 3 or more                                                                                                                                                                                                                                                                                                                                                                                                                                      |
| 4.10.7.  | How many aunts have been diagnosed with a brain tumor?                  | <input type="checkbox"/> 1 <input type="checkbox"/> 2 <input type="checkbox"/> 3 or more                                                                                                                                                                                                                                                                                                                                                                                                                                      |
| 4.10.8.  | How many uncles have been diagnosed with a brain tumor?                 | <input type="checkbox"/> 1 <input type="checkbox"/> 2 <input type="checkbox"/> 3 or more                                                                                                                                                                                                                                                                                                                                                                                                                                      |
| 4.10.9.  | How many first cousins have been diagnosed with a brain tumor?          | <input type="checkbox"/> 1 <input type="checkbox"/> 2 <input type="checkbox"/> 3 or more                                                                                                                                                                                                                                                                                                                                                                                                                                      |
| 4.10.10. | How many great aunts have been diagnosed with a brain tumor?            | <input type="checkbox"/> 1 <input type="checkbox"/> 2 <input type="checkbox"/> 3 or more                                                                                                                                                                                                                                                                                                                                                                                                                                      |
| 4.10.11. | How many great uncles have been diagnosed with a brain tumor?           | <input type="checkbox"/> 1 <input type="checkbox"/> 2 <input type="checkbox"/> 3 or more                                                                                                                                                                                                                                                                                                                                                                                                                                      |
| 4.10.12. | How many nieces have been diagnosed with a brain tumor?                 | <input type="checkbox"/> 1 <input type="checkbox"/> 2 <input type="checkbox"/> 3 or more                                                                                                                                                                                                                                                                                                                                                                                                                                      |
| 4.10.13. | How many nephews have been diagnosed with a brain tumor?                | <input type="checkbox"/> 1 <input type="checkbox"/> 2 <input type="checkbox"/> 3 or more                                                                                                                                                                                                                                                                                                                                                                                                                                      |
| 4.11.    | Which relatives have been diagnosed with adrenal cortical carcinoma?    | <input type="checkbox"/> Mother <input type="checkbox"/> Father <input type="checkbox"/> Sister <input type="checkbox"/> Brother <input type="checkbox"/> Daughter<br><input type="checkbox"/> Son <input type="checkbox"/> Grandmother <input type="checkbox"/> Grandfather <input type="checkbox"/> Aunt<br><input type="checkbox"/> Uncle <input type="checkbox"/> First Cousin <input type="checkbox"/> Great Aunt <input type="checkbox"/> Great Uncle<br><input type="checkbox"/> Niece <input type="checkbox"/> Nephew |
| 4.11.1.  | How many sisters have been diagnosed with adrenal cortical carcinoma?   | <input type="checkbox"/> 1 <input type="checkbox"/> 2 <input type="checkbox"/> 3 or more                                                                                                                                                                                                                                                                                                                                                                                                                                      |
| 4.11.2.  | How many brothers have been diagnosed with adrenal cortical carcinoma?  | <input type="checkbox"/> 1 <input type="checkbox"/> 2 <input type="checkbox"/> 3 or more                                                                                                                                                                                                                                                                                                                                                                                                                                      |
| 4.11.3.  | How many daughters have been diagnosed with adrenal cortical carcinoma? | <input type="checkbox"/> 1 <input type="checkbox"/> 2 <input type="checkbox"/> 3 or more                                                                                                                                                                                                                                                                                                                                                                                                                                      |





# Family Medicine Cancer Screening

Questionnaire last updated at: 09:27 AM EDT / 27 June 2018



Thomas Tester

MRN: 12344343344

|          |                                                                             |                                                                                                                                                                                                                                                                                                                                                                                                                                                                                                                               |
|----------|-----------------------------------------------------------------------------|-------------------------------------------------------------------------------------------------------------------------------------------------------------------------------------------------------------------------------------------------------------------------------------------------------------------------------------------------------------------------------------------------------------------------------------------------------------------------------------------------------------------------------|
| 4.11.4.  | How many sons have been diagnosed with adrenal cortical carcinoma?          | <input type="checkbox"/> 1 <input type="checkbox"/> 2 <input type="checkbox"/> 3 or more                                                                                                                                                                                                                                                                                                                                                                                                                                      |
| 4.11.5.  | How many grandmothers have been diagnosed with adrenal cortical carcinoma?  | <input type="checkbox"/> 1 <input type="checkbox"/> 2 <input type="checkbox"/> 3 or more                                                                                                                                                                                                                                                                                                                                                                                                                                      |
| 4.11.6.  | How many grandfathers have been diagnosed with adrenal cortical carcinoma?  | <input type="checkbox"/> 1 <input type="checkbox"/> 2 <input type="checkbox"/> 3 or more                                                                                                                                                                                                                                                                                                                                                                                                                                      |
| 4.11.7.  | How many aunts have been diagnosed with adrenal cortical carcinoma?         | <input type="checkbox"/> 1 <input type="checkbox"/> 2 <input type="checkbox"/> 3 or more                                                                                                                                                                                                                                                                                                                                                                                                                                      |
| 4.11.8.  | How many uncles have been diagnosed with adrenal cortical carcinoma?        | <input type="checkbox"/> 1 <input type="checkbox"/> 2 <input type="checkbox"/> 3 or more                                                                                                                                                                                                                                                                                                                                                                                                                                      |
| 4.11.9.  | How many first cousins have been diagnosed with adrenal cortical carcinoma? | <input type="checkbox"/> 1 <input type="checkbox"/> 2 <input type="checkbox"/> 3 or more                                                                                                                                                                                                                                                                                                                                                                                                                                      |
| 4.11.10. | How many great aunts have been diagnosed with adrenal cortical carcinoma?   | <input type="checkbox"/> 1 <input type="checkbox"/> 2 <input type="checkbox"/> 3 or more                                                                                                                                                                                                                                                                                                                                                                                                                                      |
| 4.11.11. | How many great uncles have been diagnosed with adrenal cortical carcinoma?  | <input type="checkbox"/> 1 <input type="checkbox"/> 2 <input type="checkbox"/> 3 or more                                                                                                                                                                                                                                                                                                                                                                                                                                      |
| 4.11.12. | How many nieces have been diagnosed with adrenal cortical carcinoma?        | <input type="checkbox"/> 1 <input type="checkbox"/> 2 <input type="checkbox"/> 3 or more                                                                                                                                                                                                                                                                                                                                                                                                                                      |
| 4.11.13. | How many nephews have been diagnosed with adrenal cortical carcinoma?       | <input type="checkbox"/> 1 <input type="checkbox"/> 2 <input type="checkbox"/> 3 or more                                                                                                                                                                                                                                                                                                                                                                                                                                      |
| 4.12.    | Which relatives have been diagnosed with thyroid cancer?                    | <input type="checkbox"/> Mother <input type="checkbox"/> Father <input type="checkbox"/> Sister <input type="checkbox"/> Brother <input type="checkbox"/> Daughter<br><input type="checkbox"/> Son <input type="checkbox"/> Grandmother <input type="checkbox"/> Grandfather <input type="checkbox"/> Aunt<br><input type="checkbox"/> Uncle <input type="checkbox"/> First Cousin <input type="checkbox"/> Great Aunt <input type="checkbox"/> Great Uncle<br><input type="checkbox"/> Niece <input type="checkbox"/> Nephew |
| 4.12.1.  | How many sisters have been diagnosed with thyroid cancer?                   | <input type="checkbox"/> 1 <input type="checkbox"/> 2 <input type="checkbox"/> 3 or more                                                                                                                                                                                                                                                                                                                                                                                                                                      |
| 4.12.2.  | How many brothers have been diagnosed with thyroid cancer?                  | <input type="checkbox"/> 1 <input type="checkbox"/> 2 <input type="checkbox"/> 3 or more                                                                                                                                                                                                                                                                                                                                                                                                                                      |
| 4.12.3.  | How many daughters have been diagnosed with thyroid cancer?                 | <input type="checkbox"/> 1 <input type="checkbox"/> 2 <input type="checkbox"/> 3 or more                                                                                                                                                                                                                                                                                                                                                                                                                                      |
| 4.12.4.  | How many sons have been diagnosed with thyroid cancer?                      | <input type="checkbox"/> 1 <input type="checkbox"/> 2 <input type="checkbox"/> 3 or more                                                                                                                                                                                                                                                                                                                                                                                                                                      |
| 4.12.5.  | How many grandmothers have been diagnosed with thyroid cancer?              | <input type="checkbox"/> 1 <input type="checkbox"/> 2 <input type="checkbox"/> 3 or more                                                                                                                                                                                                                                                                                                                                                                                                                                      |
| 4.12.6.  | How many grandfathers have been diagnosed with thyroid cancer?              | <input type="checkbox"/> 1 <input type="checkbox"/> 2 <input type="checkbox"/> 3 or more                                                                                                                                                                                                                                                                                                                                                                                                                                      |
| 4.12.7.  | How many aunts have been diagnosed with thyroid cancer?                     | <input type="checkbox"/> 1 <input type="checkbox"/> 2 <input type="checkbox"/> 3 or more                                                                                                                                                                                                                                                                                                                                                                                                                                      |
| 4.12.8.  | How many uncles have been diagnosed with thyroid cancer?                    | <input type="checkbox"/> 1 <input type="checkbox"/> 2 <input type="checkbox"/> 3 or more                                                                                                                                                                                                                                                                                                                                                                                                                                      |
| 4.12.9.  | How many first cousins have been diagnosed with thyroid cancer?             | <input type="checkbox"/> 1 <input type="checkbox"/> 2 <input type="checkbox"/> 3 or more                                                                                                                                                                                                                                                                                                                                                                                                                                      |
| 4.12.10. | How many great aunts have been diagnosed with thyroid cancer?               | <input type="checkbox"/> 1 <input type="checkbox"/> 2 <input type="checkbox"/> 3 or more                                                                                                                                                                                                                                                                                                                                                                                                                                      |
| 4.12.11. | How many great uncles have been diagnosed with thyroid cancer?              | <input type="checkbox"/> 1 <input type="checkbox"/> 2 <input type="checkbox"/> 3 or more                                                                                                                                                                                                                                                                                                                                                                                                                                      |
| 4.12.12. | How many nieces have been diagnosed with thyroid cancer?                    | <input type="checkbox"/> 1 <input type="checkbox"/> 2 <input type="checkbox"/> 3 or more                                                                                                                                                                                                                                                                                                                                                                                                                                      |



# Family Medicine Cancer Screening

Questionnaire last updated at: 09:27 AM EDT / 27 June 2018

 **Thomas Tester**  
MRN: 12344343344

|          |                                                                             |                                                                                          |
|----------|-----------------------------------------------------------------------------|------------------------------------------------------------------------------------------|
| 4.12.13. | How many nephews have been diagnosed with thyroid cancer?                   | <input type="checkbox"/> 1 <input type="checkbox"/> 2 <input type="checkbox"/> 3 or more |
| 5.       | How comfortable were you completing this questionnaire in the waiting room? | 5/5 ★★★★★                                                                                |

## SCORING BREAKDOWN

Self: 8/43  
Hereditary : 3/3  
Breast: 2  
Uterine-Ovarian: 3  
Colon: 0  
Melanoma-Sarcoma: 0  
Gastric-Kidney: 0  
Leukemia-Tumor: 0  
Carcinoma-Thyroid: 0  

---

**Total Score: 16/564**

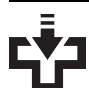

Supplement: sj-pdf-1-jpc-10.1177_21501319211069756.pdf [file sj-pdf-1-jpc-10.1177_21501319211069756.pdf]
